# Supplementary material
Source: Research Square preprint supplement (doi:10.21203/rs.3.rs-8837236/v1)
Supplement: Supplementary file 1 [file c894dc3e657003ed5b5bad4a.docx]

# Supplementary File 1 English Version of the Defensive Medicine Questionnaire

This questionnaire was developed specifically for the study titled:
'Navigating Risk Without Protection: Defensive Medicine Among General Practitioners in a Fragile Afghan Health System'.
All items correspond directly to the variables and results reported in the main manuscript.

## Section A: Demographic Information

1. Gender: ☐ Male ☐ Female

2. Age: ☐ <50 years ☐ ≥50 years

3. Marital status: ☐ Single ☐ Married

4. Years of work experience: ☐ <15 years ☐ ≥15 years

## Section B: Familiarity with Defensive Medicine

5. How familiar are you with the concept of defensive medicine?
☐ Fully familiar ☐ Somewhat familiar ☐ Not familiar

## Section C: Defensive Medical Practices

Response scale: Often / Sometimes / Never

6. Admitting patients who could be treated as outpatients ☐ Often ☐ Sometimes ☐ Never

7. Avoiding high-risk procedures or prescriptions ☐ Often ☐ Sometimes ☐ Never

8. Avoiding high-risk patients ☐ Often ☐ Sometimes ☐ Never

9. Prescribing invasive diagnostic procedures ☐ Often ☐ Sometimes ☐ Never

10. Ordering imaging tests to reduce risk ☐ Often ☐ Sometimes ☐ Never

11. Ordering diagnostic laboratory tests ☐ Often ☐ Sometimes ☐ Never

12. Excessive documentation in patient records ☐ Often ☐ Sometimes ☐ Never

13. Prescribing low-risk medications instead of optimal ones ☐ Often ☐ Sometimes ☐ Never

14. Providing extra details about treatment plans ☐ Often ☐ Sometimes ☐ Never

15. Referring patients to higher-level specialists ☐ Often ☐ Sometimes ☐ Never

16. Monitoring treatment outcomes more than necessary ☐ Often ☐ Sometimes ☐ Never

17. Requesting additional follow-up visits ☐ Often ☐ Sometimes ☐ Never

18. Giving detailed instructions about medication use ☐ Often ☐ Sometimes ☐ Never

## Section D: Perceived Causes of Defensive Medicine

Response scale: 1 = Strongly disagree to 5 = Strongly agree

19. Low risk tolerance and low clinical confidence ☐1 ☐2 ☐3 ☐4 ☐5

20. Limited specialized knowledge in some clinical areas ☐1 ☐2 ☐3 ☐4 ☐5

21. Lack of clinical guidelines ☐1 ☐2 ☐3 ☐4 ☐5

22. Ensuring adherence to professional standards ☐1 ☐2 ☐3 ☐4 ☐5

23. Colleagues’ past experiences with lawsuits ☐1 ☐2 ☐3 ☐4 ☐5

24. Defensive training during medical education ☐1 ☐2 ☐3 ☐4 ☐5

25. Previous malpractice concerns ☐1 ☐2 ☐3 ☐4 ☐5

26. Lack of professional liability insurance ☐1 ☐2 ☐3 ☐4 ☐5

27. Desire to reassure patients’ families ☐1 ☐2 ☐3 ☐4 ☐5

28. Lack of legal support for physicians ☐1 ☐2 ☐3 ☐4 ☐5

29. Protecting professional reputation ☐1 ☐2 ☐3 ☐4 ☐5

30. High perceived cost of medical errors ☐1 ☐2 ☐3 ☐4 ☐5

31. Patient or family demand for certainty ☐1 ☐2 ☐3 ☐4 ☐5

32. Fear of lawsuits ☐1 ☐2 ☐3 ☐4 ☐5

33. Belief that defensive medicine is beneficial ☐1 ☐2 ☐3 ☐4 ☐5

34. Fear of violence or physical threats ☐1 ☐2 ☐3 ☐4 ☐5

## Section E: Strategies to Reduce Defensive Medicine

Response scale: 1 = Strongly disagree to 5 = Strongly agree

35. Strengthening legal protections for physicians ☐1 ☐2 ☐3 ☐4 ☐5

36. Promoting evidence-based medicine ☐1 ☐2 ☐3 ☐4 ☐5

37. Increasing public awareness about defensive medicine ☐1 ☐2 ☐3 ☐4 ☐5

38. Improving teamwork among healthcare professionals ☐1 ☐2 ☐3 ☐4 ☐5

39. Reforming complaint-handling processes ☐1 ☐2 ☐3 ☐4 ☐5

40. Establishing patient data registries ☐1 ☐2 ☐3 ☐4 ☐5
